# Supplementary material for: Phylogenetically Diverse Burkholderia Associated with Midgut Crypts of Spurge Bugs, Dicranocephalus spp. (Heteroptera: Stenocephalidae)
Source: PubMed Central journal article supplement (PMC4912149; doi:10.1264/jsme2.me16042), 2016-06-03
Supplement: 31_145_s1.pdf [file 31_145_s1.pdf]

**Table S1. PCR primers and probes used in this study.**

| Target organism                                       | Target gene                                | Primer name                          | Primer sequence (5'-3')                                | Product size | Reference <sup>1</sup> |
|-------------------------------------------------------|--------------------------------------------|--------------------------------------|--------------------------------------------------------|--------------|------------------------|
| <i>Primers for amplifying, cloning and sequencing</i> |                                            |                                      |                                                        |              |                        |
| Bacteria                                              | 16S rRNA                                   | 07F<br>1507R                         | AGAGTTTGATCMTGGCTCAG<br>TACCTTGTTACGACTTCAC            | 1.5 kb       | [1]                    |
| <i>Burkholderia</i> strains                           | <i>gyrB</i>                                | <i>gyrB</i> 135F<br><i>gyrB</i> 850R | ACCGGTCTGCAYCACCTCGT<br>TCGTTGTAGCTGTCGTTCCACTGC       | 0.65 kb      | modified from [2]      |
| Insect (Stenocephalidae)                              | <i>cox1</i>                                | COI_long22<br>Pat_R                  | ACWAAYCATAAAGATATTGGMAC<br>TCCAATGCACTAATCTGCCATATTA   | 1.55 kb      | [3]<br>[4]             |
| "                                                     | <i>nad1</i><br>(+ 2nd half of <i>cob</i> ) | steno_ND1_F1<br>steno_ND1_R1         | GTAAAATGATTATGAGGRGGATT<br>CTTAGGGATAACAGCGTAATTTTYYGG | 2.0 kb       | [3]                    |
| "                                                     | <i>cob</i> (1st half)                      | steno_cytB_F1<br>steno_cytB_R3       | ATTTATATAGCAAGAGTAGCATCAAA<br>TTCTGGTTGAATATGAACTGGTGT | 1.1 kb       | [3]                    |
| "                                                     | <i>nad6</i>                                | steno_ND4_F2<br>steno_ND6_R1         | CCTAAACCCAAAGCACCTTCACA<br>AATCCYCCTCATAATCATTTTAC     | 1.35 kb      | [3]                    |
| Target organism                                       | Target gene                                | probe name                           | Probe sequence (5'-3')                                 | Labeling dye | Reference              |
| <i>Probes for fluorescence in situ hybridization</i>  |                                            |                                      |                                                        |              |                        |
| Bacteria                                              | 16S rRNA                                   | EUB338                               | GCTGCCTCCCGTAGGAGT                                     | Cy3          | [5]                    |
| EUB-Planctomycetes                                    | 16S rRNA                                   | EUB338 II                            | GCAGCCACCCGTAGGTGT                                     | Cy3          | [5]                    |
| EUB-Verrucomicrobia                                   | 16S rRNA                                   | EUB338 III                           | GCAGCCACCCGTAGGTGT                                     | Cy3          | [5]                    |
| -                                                     | 16S rRNA                                   | NON338                               | ACTCCTACGGGAGGCAGC                                     | Cy3          | [6]                    |
| <i>Burkholderia</i> -symbiont of<br>Stenocephalidae   | 16S rRNA                                   | StenoSymb440                         | ACTAATACTGTGGGGGGA                                     | Cy3          | [3]                    |

<sup>1</sup>[1] Lane, D. J. 1991. In E. Stackenbrandt and M. Goodfellow (ed.), John Wiley and Sons, New York, NY. [2] 1. Spilker et al., 2009. J. Clin. Microbiol. 47: 2607–2610. [3]

This study. [4] Simon et al., 1994. Ann. Entomol. Soc. Am. 87: 651–702. [5] Daims et al., 1999. Syst. Appl. Microbiol. 22: 434–444. [6] Manz et al., 1992. Syst. Appl. Microbiol. 15: 593–600.

**Table S2. The number of *gyrB* gene clones in each OTU subgroups of the *Burkholderia* symbionts.**

| Species                          | Insect ID | Stenocephalidae-clade |      |      |      |      | SBE clade |      |      |      |       | PBE clade | Total |           |
|----------------------------------|-----------|-----------------------|------|------|------|------|-----------|------|------|------|-------|-----------|-------|-----------|
|                                  |           | OTU1                  | OTU2 | OTU3 | OTU4 | OTU5 | OTU6      | OTU7 | OTU8 | OTU9 | OTU10 | OTU11     |       |           |
| <i>Dicranocephalus agilis</i>    |           |                       |      |      |      |      |           |      |      |      |       |           |       |           |
|                                  | Dag1      | 2                     | -    | -    | -    | -    | -         | -    | -    | -    | -     | -         | -     | 2         |
|                                  | Dag2      | -                     | -    | 3    | 1    | 4    | -         | -    | -    | -    | -     | -         | -     | 8         |
| <i>Dicranocephalus medius</i>    |           |                       |      |      |      |      |           |      |      |      |       |           |       |           |
|                                  | Dme1      | 1                     | -    | -    | -    | -    | -         | -    | -    | -    | -     | -         | -     | 1         |
|                                  | Dme2      | 8                     | -    | -    | -    | -    | -         | -    | -    | -    | -     | -         | -     | 8         |
|                                  | Dme3      | 2                     | 5    | -    | -    | -    | -         | -    | -    | -    | -     | -         | -     | 7         |
|                                  | Dme4      | -                     | 3    | -    | -    | -    | -         | -    | -    | -    | -     | -         | -     | 3         |
|                                  | Dme5      | -                     | 2    | -    | -    | -    | -         | -    | -    | -    | -     | -         | -     | 2         |
|                                  | Dme6      | 12                    | -    | -    | -    | -    | -         | -    | -    | -    | -     | -         | -     | 12        |
| <i>Dicranocephalus lateralis</i> |           |                       |      |      |      |      |           |      |      |      |       |           |       |           |
|                                  | Dla1      | -                     | -    | -    | -    | -    | 9         | 1    | 1    | -    | -     | -         | -     | 11        |
|                                  | Dla2      | -                     | -    | -    | -    | -    | -         | -    | 3    | -    | -     | -         | -     | 3         |
|                                  | Dla3      | -                     | -    | -    | -    | -    | -         | -    | 7    | 1    | -     | -         | -     | 8         |
|                                  | Dla4      | -                     | -    | -    | -    | -    | -         | -    | -    | -    | 10    | -         | -     | 10        |
| <i>Dicranocephalus albipes</i>   |           |                       |      |      |      |      |           |      |      |      |       |           |       |           |
|                                  | Dal1      | -                     | -    | -    | -    | -    | -         | -    | -    | -    | -     | 13        | -     | 13        |
|                                  | Dal2      | -                     | 3    | -    | -    | -    | -         | -    | -    | -    | -     | -         | -     | 3         |
|                                  | OTU total | 25                    | 13   | 3    | 1    | 4    | 9         | 1    | 11   | 1    | 10    | 13        | -     | <b>91</b> |

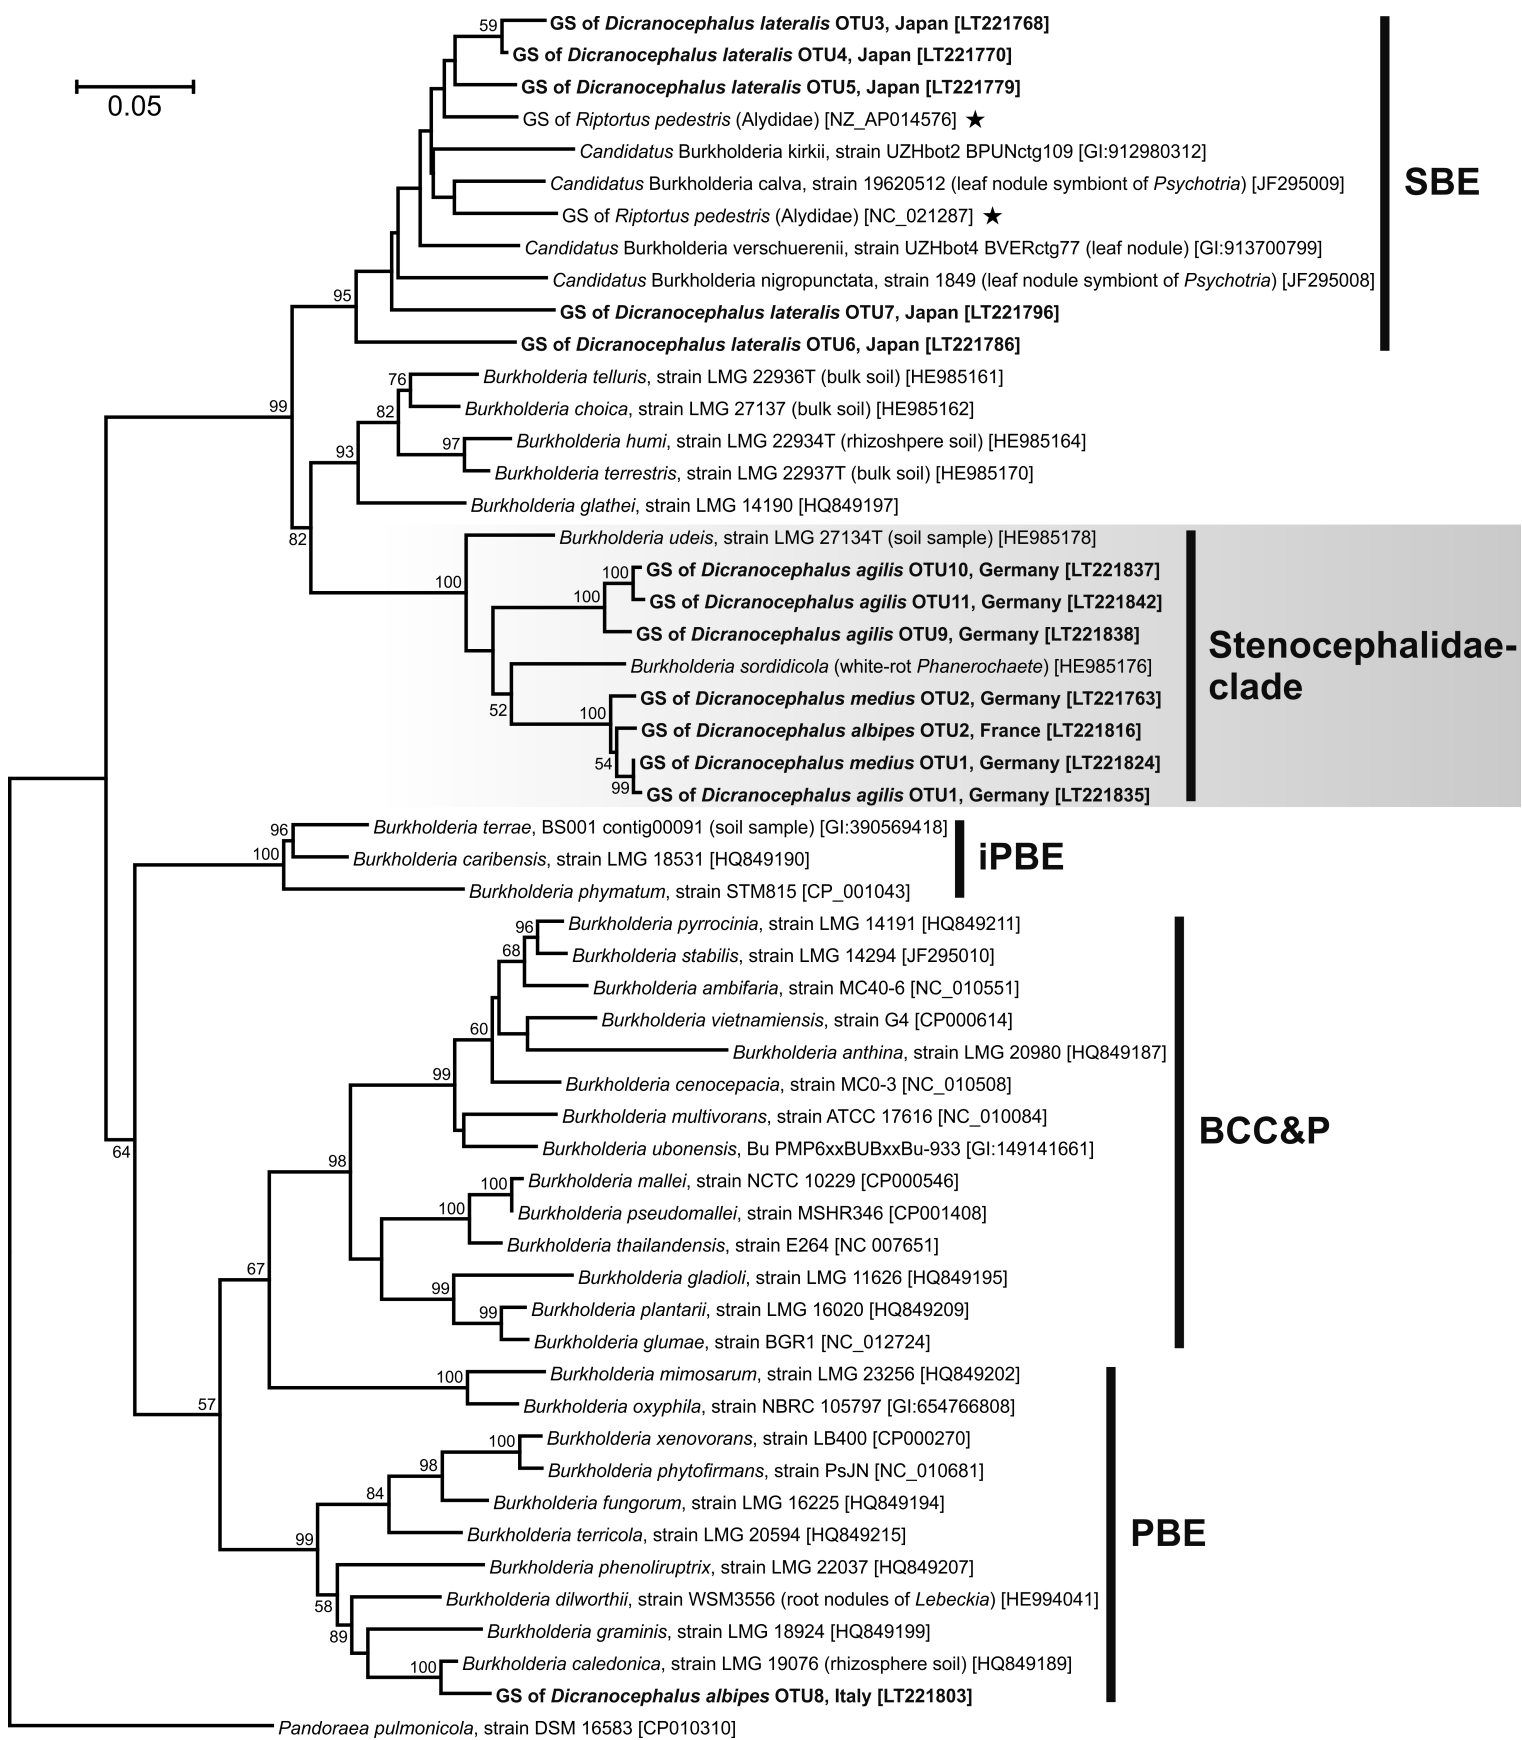

**Fig. S1.** Molecular phylogeny of the gut symbiotic bacteria of stenocephalid species based on the *gyrB* sequences. The tree displays a maximum likelihood (ML) phylogeny of eleven OTUs of the gut symbiotic bacteria (GS) identified from *Dicranocephalus albipes*, *D. agilis*, *D. lateralis* and *D. medius* together with selected representatives of the different *Burkholderia* groups. The alignment of 662 nucleotide sites of the *Burkholderia gyrB* gene was used. The gut symbionts of the stenocephalid species are shown in bold. The origins or sources of isolation of the *Burkholderia* strains/sequences are represented in parentheses. Accession numbers in the DNA database (DDBJ/EMBL/GenBank) are shown in square brackets. *Burkholderia* gut symbionts of other stinkbug families are marked with an asterisk. The major *Burkholderia* clades (BCC&P, SBE and PBE) including the subclade “insect-associated PBE (iPBE)” and the “Stenocephalidae-clade” here described are indicated on the right. Bayesian (MrBayes) and neighbor-joining (NJ) analyses gave essentially the same results (data not shown). Bootstrap values higher than 50% are depicted at the nodes.
